# Supplementary material for: Increased Expression of SIM2-s Protein Is a Novel Marker of Aggressive Prostate Cancer
Source: Oxford University Press journal article supplement (doi:10.1158/1078-0432.ccr-06-1207), 2007-02-01
Supplement: 10780432ccr061207-sup-legend_to_supplementary_figure_2.pdf [file 10780432ccr061207-sup-legend_to_supplementary_figure_2.pdf]

**Legend to Supplementary Fig. 2:**

Sensitivity and 1 – specificity by ROC curves for *SIM2-s*, *SIM2-l* and *SIM2-total* mRNA relative expression values. Optimal cut-off points for classifying samples as malignant were 2.0, 8.0 and 3.2 for *SIM2-s*, *SIM2-l* and *SIM2-total*. The sensitivity and specificity for these cut-off points were 0.95 and 0.62 for *SIM2-s*, 0.86 and 0.72 for *SIM2-l*, and 0.89 and 0.69 for *SIM2-total*, respectively.
